# Supplementary material
Source: PubMed Central journal article supplement (PMC6123660)
Supplement: EMBR-19-e46085-s001.pdf [file EMBR-19-e46085-s001.pdf]

**Herrmann et al.**  
**Appendix Content**

**Appendix Figure S1:** Phenotype rescue and localization of GFP-POK2.

**Appendix Figure S2:** POK2 motor domain, POK2(1-589) localizes to the phragmoplast midzone.

**Appendix Figure S3:** Genetic interaction of POK2 and MAP65-3/PLEIADE.

**Appendix Table S1:** Oligonucleotides for Cloning.

**Appendix Table S2:** Oligonucleotides for Transcript amplification.

**Appendix References**

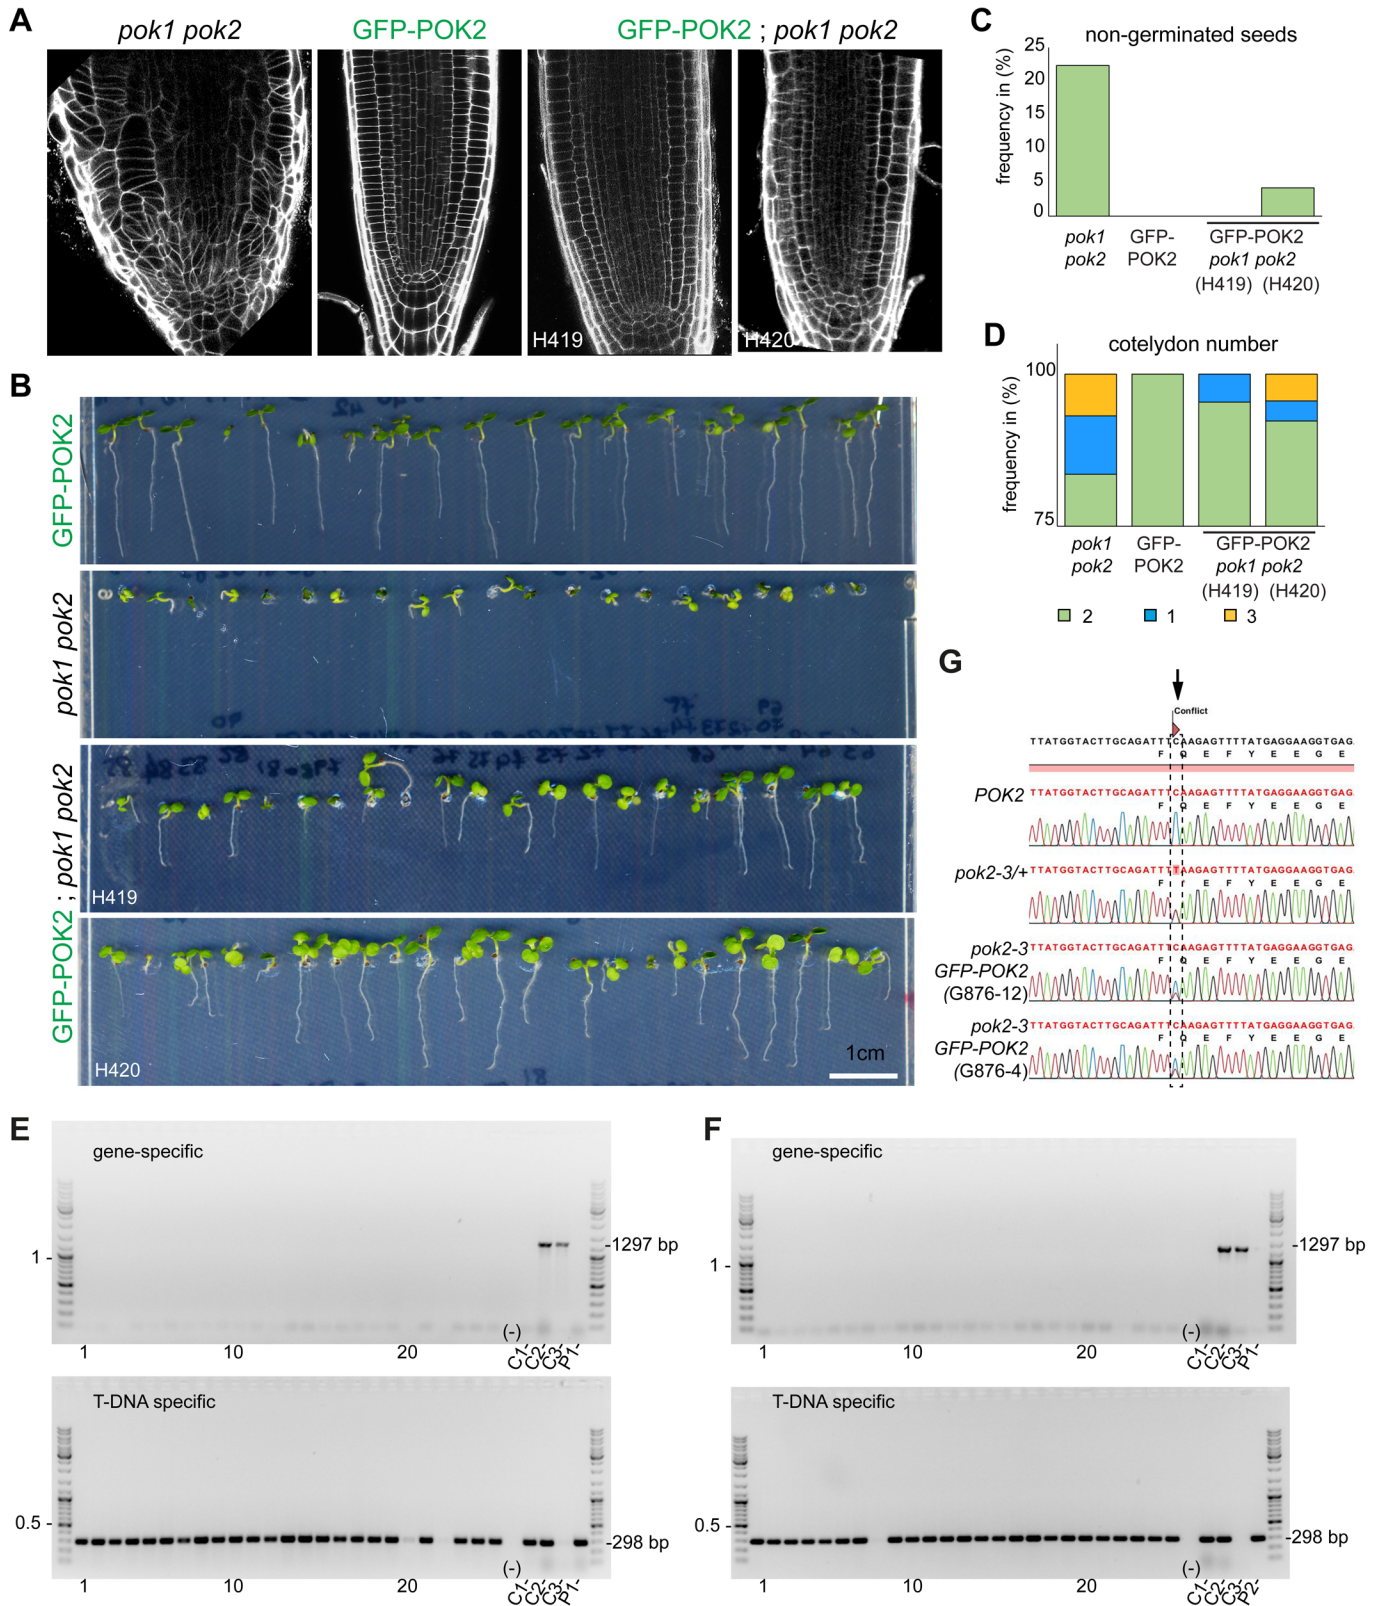

Appendix Figure S1

**Appendix Figure S1: Phenotype rescue and localization of GFP-POK2.** (A) Single images showing a median plane in roots of *pok1 pok2* seedlings as well as of seedlings expressing GFP-POK2 in wild type and double mutant background (GFP-POK2;*pok1 pok2*, rescue lines) after staining with propidium iodide. Note the restoration of phenotypically wild type cellular organization in the rescue lines (H419, H420). (B) Images of seedlings corresponding to the above mentioned transgenic plant lines. Note the restoration of root growth. (C and D) Quantification of phenotypic abnormalities in *pok1 pok2* mutants, transgenic line expressing GFP-POK2 (GFP-POK2) and two rescue lines GFP-POK2;*pok1 pok2* (H419, n = 87; H420, n = 95). (C) Frequency (%) of non-germinating seeds. (D) Frequency (%) of seedlings with two (2), one (1) or three (3) cotyledons. (E and F) Representative gel electrophoresis of polymerase chain reaction (PCR) products from 25 randomly selected individuals of (E) H419 and (F) H420 rescue lines. (E) The 298 bp PCR fragment amplified with POK1-Nru/Xba-F and LBb1.3 (Appendix Table S2) indicates the presence of the T-DNA-specific insertion in the POK1 locus. (F) The 1297 bp PCR fragment amplifies from genomic POK1 using POK1-Nru/Xba-F and POK1-Spe-R (Appendix Table S2). For all samples, except for # 20 and 22 in (E) and # 8 in (F), which were of low quality, T-DNA-specific, but not gene-specific PCR fragments were amplified, indicating that the *pok1-1* T-DNA allele was homozygous in the rescue line. C1-C3 indicate controls. C1 *pok1 pok2*, C2 *pok1/+ pok2/+*, C3 Col-0. (-) indicates negative (no DNA) control. P1 is parent G876-4 in (E) and parent P2 G876-12 in (F). POK1 and POK2 are closely linked. Therefore, homozygosity of *pok1-1* implies homozygosity of *pok2-3*. (G) The parent plants P1 G876-4 (parent of H419) and P2 G876-12 (parent H420) were sequenced and simultaneous presence of the *pok2-3* mutation and GFP-POK2 transgene were confirmed by the double peaks (dashed box) in the histogram. Thymine (T) indicates *pok2-3* mutation and Guanine (G) indicates presence of POK2 transgene (also confirmed by Kanamycin resistance). Sequences of wild type and *pok2-3/+* heterozygous plants are shown as well. Substitution of G by Thymine (T) leads to premature STOP codon (Lipka et al., 2014).

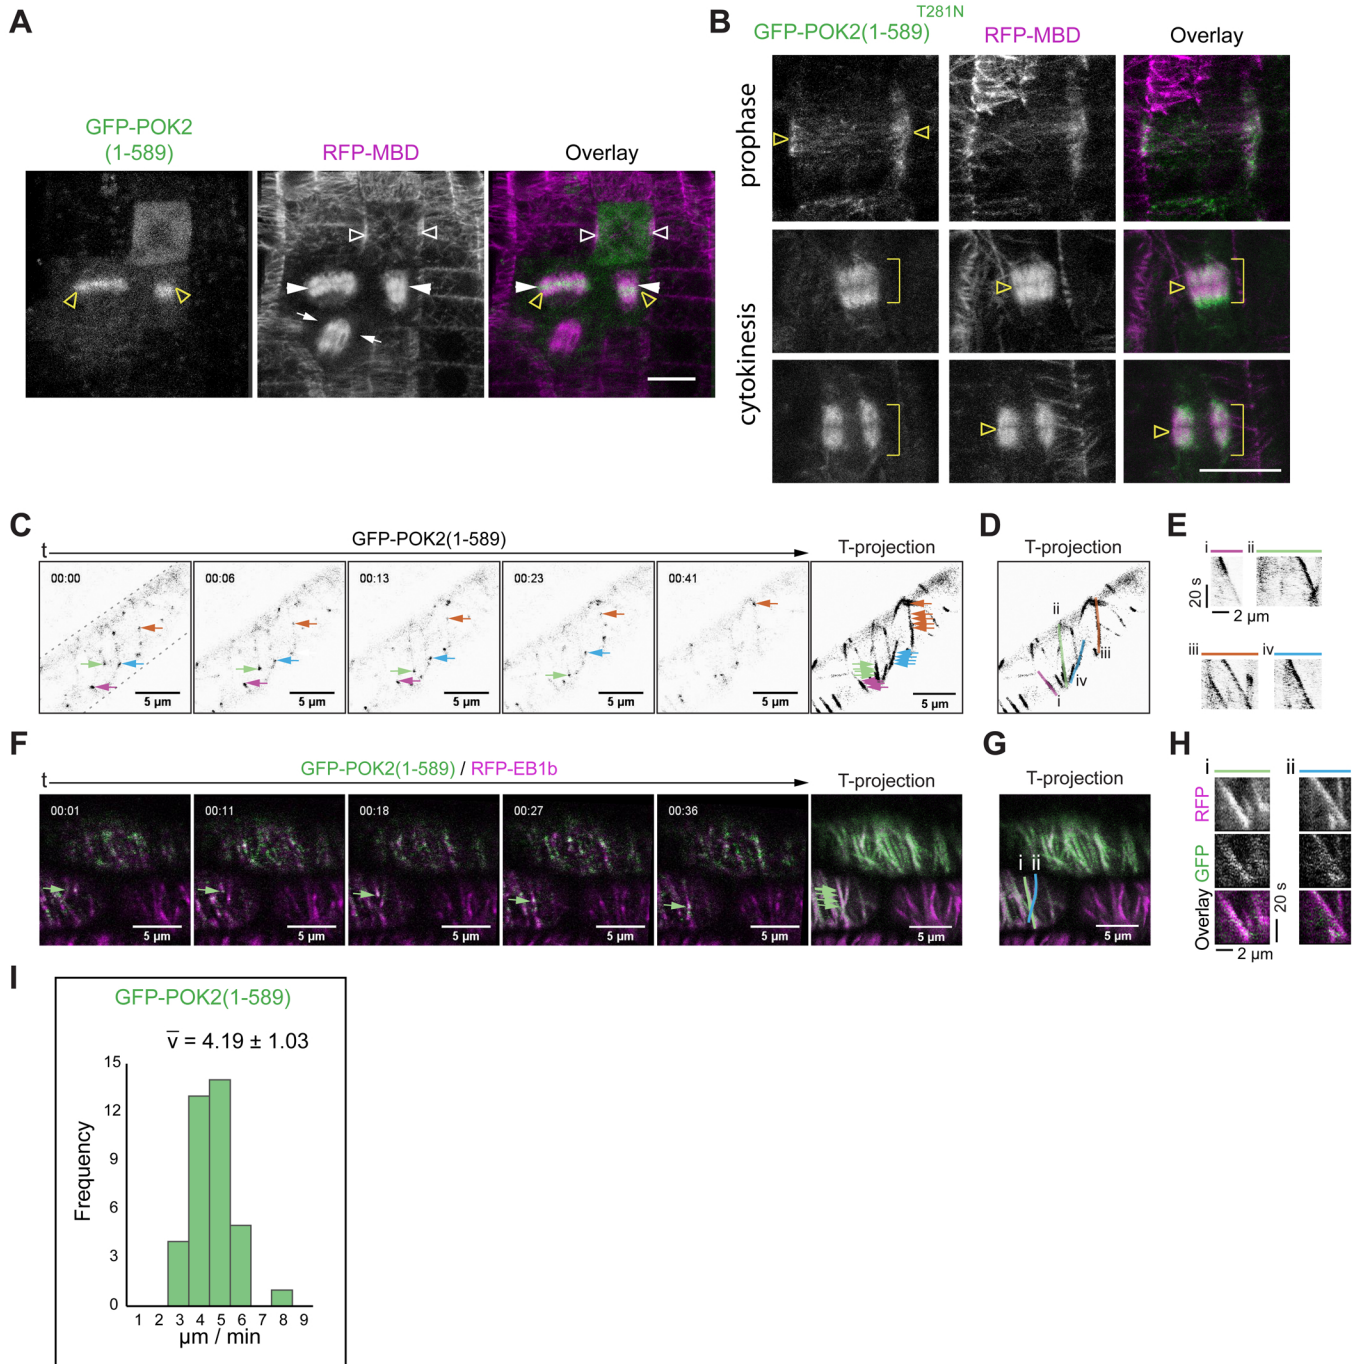

Appendix Figure S2

**Appendix Figure S2: POK2 motor domain, POK2(1-589) localizes to the phragmoplast midzone.** (A) Cells in cytokinesis (yellow triangles, white arrow heads) display GFP-POK2(1-589) signal at the midzone, while cells in prophase (white triangle) and anaphase (white arrows) show cytosolic GFP- POK2(1-589). (B) Co-localization of rigor mutant GFP-POK2 POK2(1-589)<sup>T281N</sup> with mitotic microtubule arrays in prophase, early and late cytokinesis. The rigor mutant GFP-POK2(1-589)<sup>T281N</sup> localizes to mitotic (brackets) and cortical microtubules (yellow triangles) point to the preprophase band), but remains excluded from the phragmoplast midzone region (indicated by triangles). Scale bars indicate 10  $\mu\text{m}$ . (C) Individual time points of time series depicting GFP-POK2(1-589) in interphase root cell. Colored arrows point to individual fluorescent dots. In the T-projection of the time series, arrows from individual frames are blotted. (D) T-projection as shown in (C) Tracks (i) - (iv) are indicated by color overlay. (E) Kymographs of tracks (i) - (iv) selected in (H), indicating continuous signal displacement over time. (F) Selected images of a time series of root meristem cells, co-expressing GFP-POK2(1-589) and RFP-End Binding Protein (EB) 1b, arrows indicate GFP-POK2(1-589) signal along RFP-EB1b labelled microtubules. Time-projection (T-projection) shows maximum signal projection of all time frames. Arrows correspond to arrows in single time frames. (G) T-projection of time series in (F), green (i) and blue (ii) line indicate line selections, used for kymographs depicted in (H). (H) Single channels and overlay of kymographs along line selection indicated in (G). Note that the signal contrast edge of GFP-POK2(1-589) and RFP-EB1b co-align. (I) Frequency distribution of *in vivo* speeds of GFP-POK2(1-589) (n= 37, combined from five cells in four root meristems). Velocity  $4.19 \pm 1.03 \mu\text{m} / \text{min}$  is presented as mean  $\pm$  STDV. Relates to Figure 4 and Movie EV3, Movie EV4.

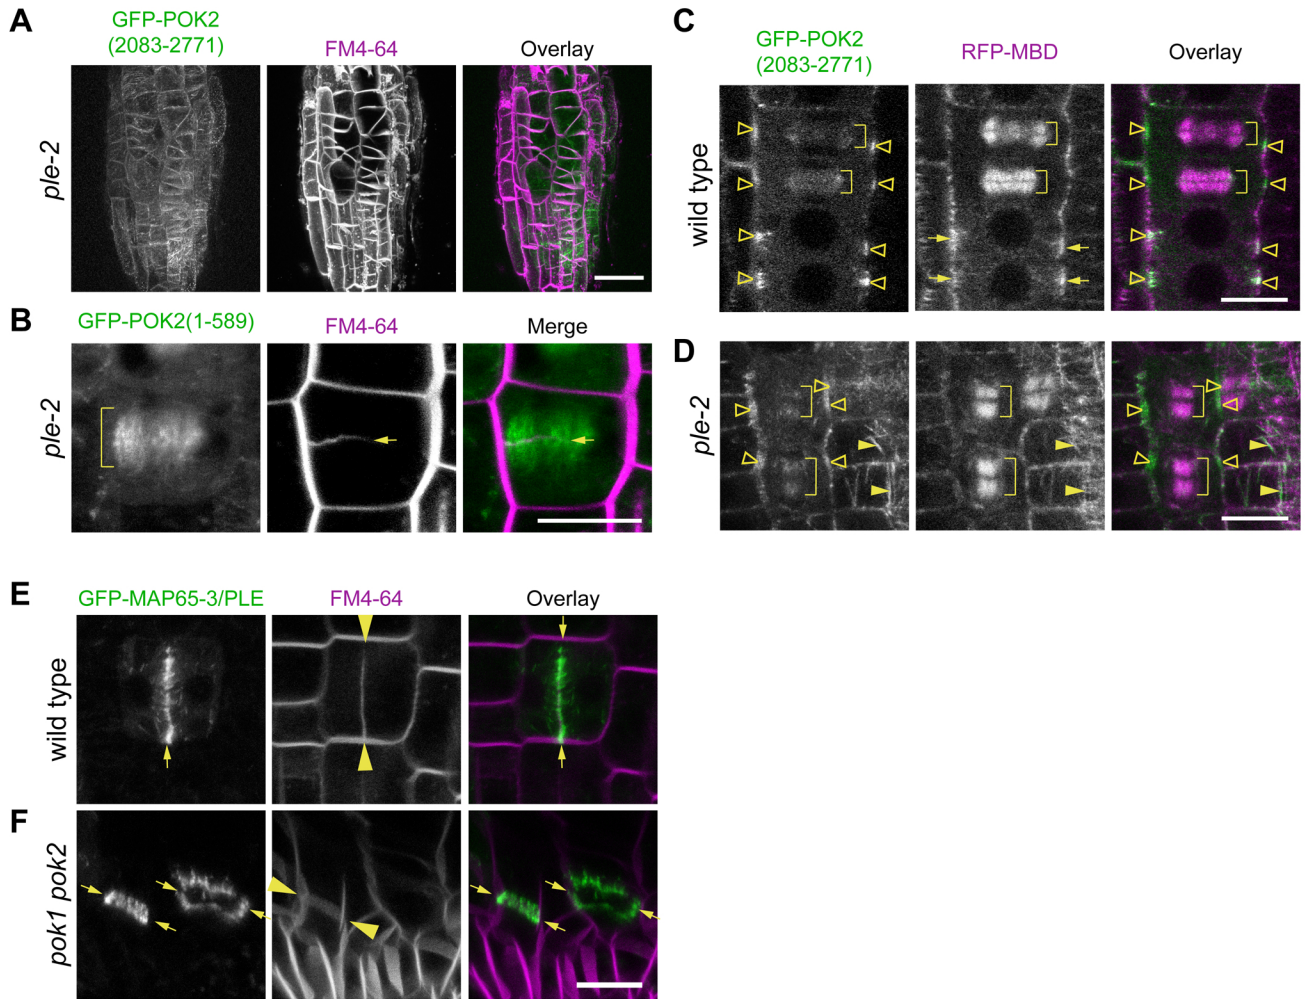

Appendix Figure S3

**Appendix Figure S3: Genetic interaction of POK2 and MAP65-3/PLEIADE.** (A) Root meristem of *pleiade* (*ple-2*) mutant expressing GFP-POK2(2083-2771). FM-64 staining allows visualization of the plasma membranes. Scale bar indicates 25  $\mu\text{m}$ . (B) GFP-POK2(1-589) motor domain along phragmoplast microtubules (brackets) in the *pleiade* (*ple-2*) mutant. Arrow points to a cell wall stub, characteristic for *ple* mutants. Scale bar indicates 10  $\mu\text{m}$ . (C and D) GFP-POK2(2083-2771) localization in (C) wild type and (D) *ple-2* mutant. GFP-POK2(2083-2771) co-localize with microtubules (brackets, arrows and arrowheads) and accumulates at the cortical division site (triangles). Scale bars 10  $\mu\text{m}$ . (E and F) GFP-MAP65-3/PLE localizes at the midzone (arrows) in (E) wild type and (F) *pok1 pok2* mutant cytokinetic cells. Plasma membranes visualized by FM4-64 staining. Arrow heads indicate cell plate fusion sites. Images are maximum Z-projections. Scale bars indicate 10  $\mu\text{m}$ .

**Appendix Table S1: Oligonucleotides for Cloning**

| Cloning                                            | Name                 | Oligos 5' – 3'                                              |
|----------------------------------------------------|----------------------|-------------------------------------------------------------|
| MAP65-3/PLE                                        | PLE_ATG_KPN_F        | atggtaccATGGCAAGTGTTCAAAAAGAT                               |
|                                                    | PLE_w/o STOP_NOT_R   | atgcggccgcttAACCAAACGACATTCAGACTGTA                         |
| pENTR:POK2 (1-189)                                 | NotI_POK2_ATG_F      | AATAATAACATGCGGCCGCaATGTCAAAGGAGACCAAGC<br>TTTC             |
|                                                    | POK2MD1-189aa_R      | aaTCTAGAtcaCCAGAAAGATGGATCTTCCTT                            |
| pENTR:POK2MD(183-589)                              | NotI_POK2_549_F      | AATAATAACATGCGGCCGCaATGGAAGATCCATCTTTCTG<br>GATGGATCACAA    |
|                                                    | Asc_POK2_1770 stop R | AATAATAACATGGCGCGCcttaACTTGATGGCGAATCGAC<br>T               |
| pENTR:POK2(1-589)                                  | NotI_POK2_ATG_F      | AATAATAACATGCGGCCGCaATGTCAAAGGAGACCAAGC<br>TTTC             |
|                                                    | Asc_POK2_1770 stop R | AATAATAACATGGCGCGCcttaACTTGATGGCGAATCGAC<br>T               |
| pENTR:POK2(1-589) <sup>T281N</sup>                 | POK2_T281N_F         | AAGTGGAAAGaacTATACAATGCTT                                   |
|                                                    | POK2_T281N_R         | AAGCATTGTATAggtCTTCCACTT                                    |
| pDONR221:POK2(2083-2771)                           | minB1F-POK2C         | aaaaagcagggtccaccATGGACAAGAAAGATGAAATAAAGG<br>AAATC         |
|                                                    | minB2R-POK2C stop    | agaaagctgggtcCTACCTGTCTAAAGAAGAGAAAAAAGGA<br>AC             |
| pENTR:POK2(2083-2771)                              | KAT2_BamHI_6250_F    | ggatccGACAAGAAAGATGAAACAAAGGAAATC                           |
|                                                    | POK2_STOP_XbaI_R     | ATtctagaTTtccactgtctaaagaagagaaa                            |
| pENTR:POK2(Δ590-2082)<br>and<br>pENTR:POK2(1-2771) | POK2 MD linker C_F   | aagttctatactttctagagaataggaacttcAGGGACAAGAAAGA<br>TGAAACAAA |
|                                                    | POK2 MD linker C_R   | tcctattctctagaaagtataggaactcccTACACTTGATGGCGAA<br>TCGA      |
| PCR I (6847 bp genomic fragment)                   | Kat2-BsrGI-F         | ccgcggcatgctgtacaagagtgatatcg                               |
|                                                    | Kat2-68491R          | gactctgactccatgatcttc                                       |
| PCR II (5464 bp genomic fragment)                  | POK2-799 F           | ATGGAGAGGAGTATAAATGGGTA                                     |
|                                                    | Kat2-EcoRI-R         | ctgtccttcactacagtgaggctggag                                 |
|                                                    | B1F                  | ggggacaagttgtacaaaaagcaggctccacc                            |
|                                                    | B2R                  | ggggaccactttgtacaagaaagctgggtc                              |
| pENTR:EB1b                                         | EB1b ecoRI F         | gaattcAAAAATGGCGACGAACATT                                   |
|                                                    | EB1b xhoI R          | ctcgagTTAAGTTTGGGTCTCTGCAGCA                                |
| <b>Genotyping</b>                                  |                      |                                                             |
| POK1-XbaI/NruI-F                                   | <i>POK1/pok1-1</i>   | gctctagatcgcgacagcattgacaagaatc                             |
| POK1SpeI-R                                         | <i>POK1</i>          | tcactagtgcaccttatcatag                                      |
| Lb1.3                                              | <i>pok1-1</i>        | atthtggcatttcggaac                                          |



**Appendix Table S2: Oligonucleotides for Transcript amplification**

| Fragment | Primer pair     | Oligos 5'–3'                                |
|----------|-----------------|---------------------------------------------|
| 1        | GFP-CDS 467_F   | acaagcagaagaacggcatcaa                      |
|          | POK2-BstEII_R   | ttaggcggtcaccctcagcgc                       |
| 2        | NotI-POK2_ATG_F | aataataacatgcggccgcaatgtcaaaggagaccaagctttc |
|          | POK2-BstEII_R   | ttaggcggtcaccctcagcgc                       |
| 3        | POK2-BstEII_F   | gcgctgagggtgaccgcctaa                       |
|          | POK2-BsrGI_R    | ccgcggcgatatcactctgtacagcatg                |
| 4        | POK2-BsrGI_F    | ccgcgcatgctgtacaagagtgatcgc                 |
|          | POK2-BspHI_R    | actagttagatagcacaatccttcgatg                |
| 5        | POK2-BspHI_F    | actagtatcatgaaggattgtgctatctc               |
|          | POK2-5084_R     | cctctcatcgatggcatcat                        |
| 6        | POK2-5084_F     | atgatccatcgatgaga                           |
|          | POK2-BamHI_Stop | ggatcctttcacctgtctaaagaagagaaa              |

**Appendix References**

Lipka, E., Gadeyne, A., Stöckle, D., Zimmermann, S., De Jaeger, G., Ehrhardt, D.W., Kirik, V., Van Damme, D., and Müller, S. (2014). The Phragmoplast-Orienting Kinesin-12 Class Proteins Translate the Positional Information of the Preprophase Band to Establish the Cortical Division Zone in *Arabidopsis thaliana*. *Plant Cell* **26**, 2617-2632.
